# Supplementary material for: WNK regulates Wnt signalling and β-Catenin levels by interfering with the interaction between β-Catenin and GID
Source: PubMed Central journal article supplement (PMC7665214; doi:10.1038/s42003-020-01386-2), 2020-11-12
Supplement: 42003_2020_1386_MOESM1_ESM.pdf [file 42003_2020_1386_MOESM1_ESM.pdf]

## **Supplementary information**

**WNK regulates Wnt signalling and  $\beta$ -Catenin levels by interfering with the interaction between  $\beta$ -Catenin and GID**

**Atsushi Sato, Masahiro Shimizu, Toshiyasu Goto, Hiroyuki Masuno, Hiroyuki Kagechika, Nobuyuki Tanaka and Hiroshi Shibuya**

## Supplementary Figure 1

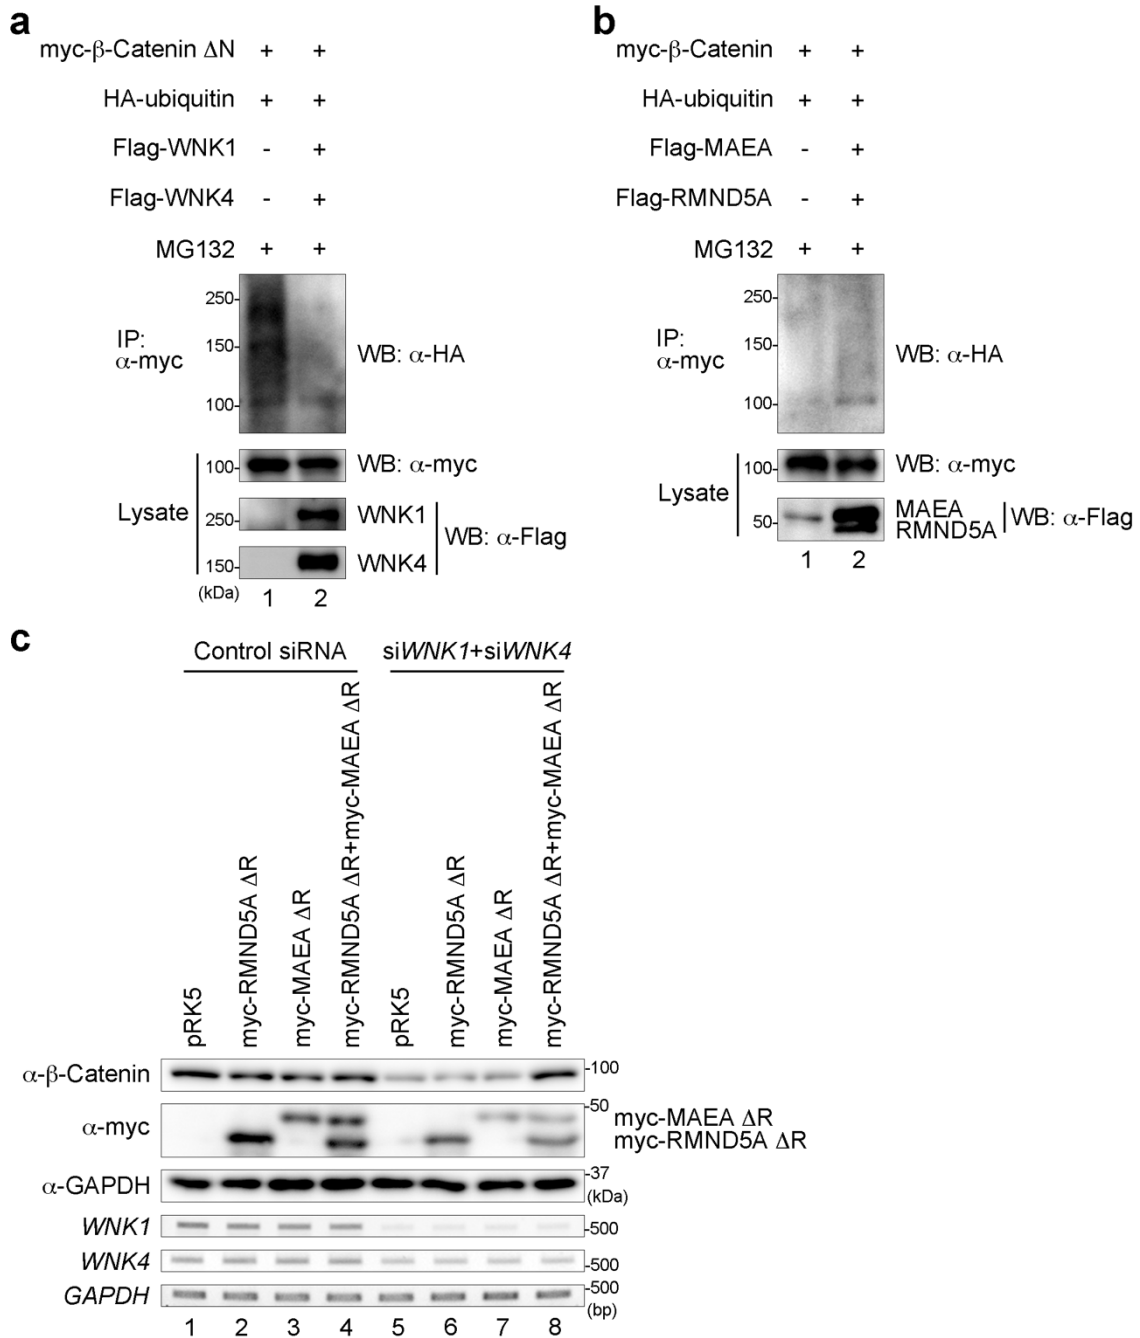

**Supplementary Figure 1. WNK regulates the ubiquitination or protein level of β-Catenin through the GID complex. (a) Western blot analysis of ubiquitinated β-Catenin ΔN following the expression of WNK1 and WNK4 in HEK293T cells. (b)**

Western blot analysis of ubiquitinated  $\beta$ -Catenin following the expression of RMND5A and MAEA in HEK293T cells. (c) Western blot analysis of endogenous  $\beta$ -Catenin following the knockdown of both *WNK1* and *WNK4*, or the expression of RMND5A  $\Delta$ R and/or MAEA  $\Delta$ R in SW480 cells.

## Supplementary Figure 2

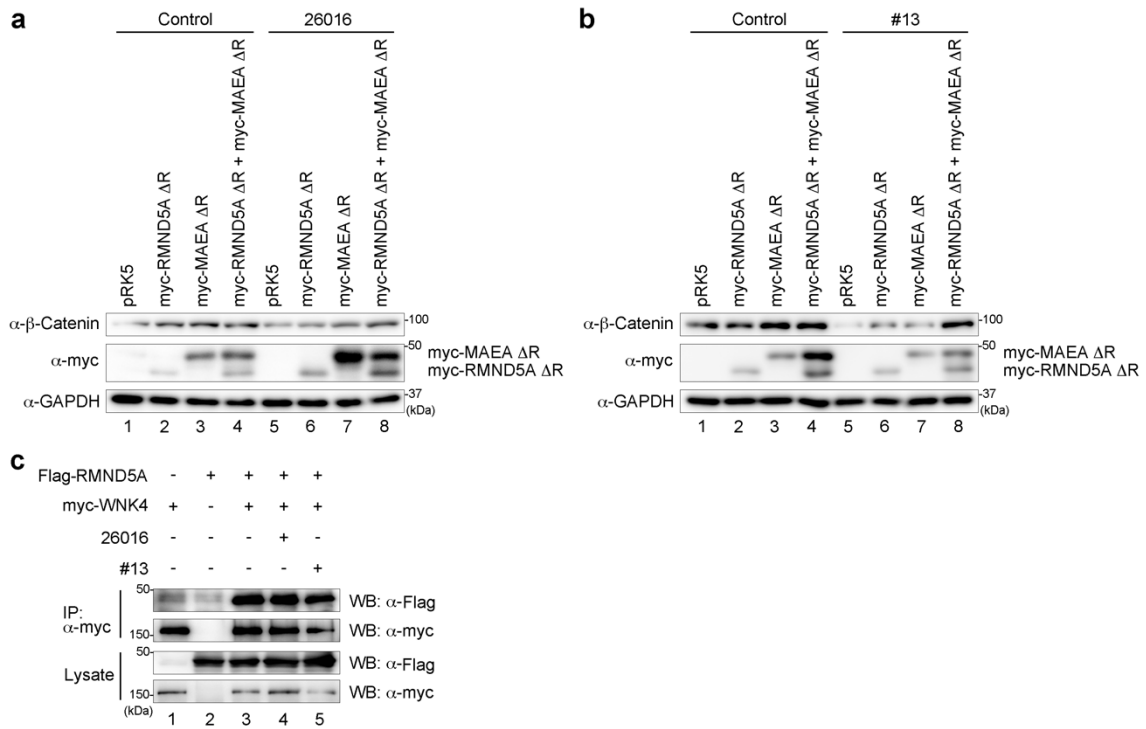

**Supplementary Figure 2. The dominant-negative form of the GID complex could rescue the reduction of β-Catenin by WNK inhibitors.** (a-b) Western blot analysis of endogenous β-Catenin following treatment with the WNK inhibitor 26016 (a) or #13 (b), or the expression of RMND5A ΔR and/or MAEA ΔR in SW480 cells. (c) The interaction between WNK4 and RMND5A following treatments with WNK inhibitors (26016 and #13) was examined in HEK293T cells by co-immunoprecipitation.



### Supplementary Figure 3

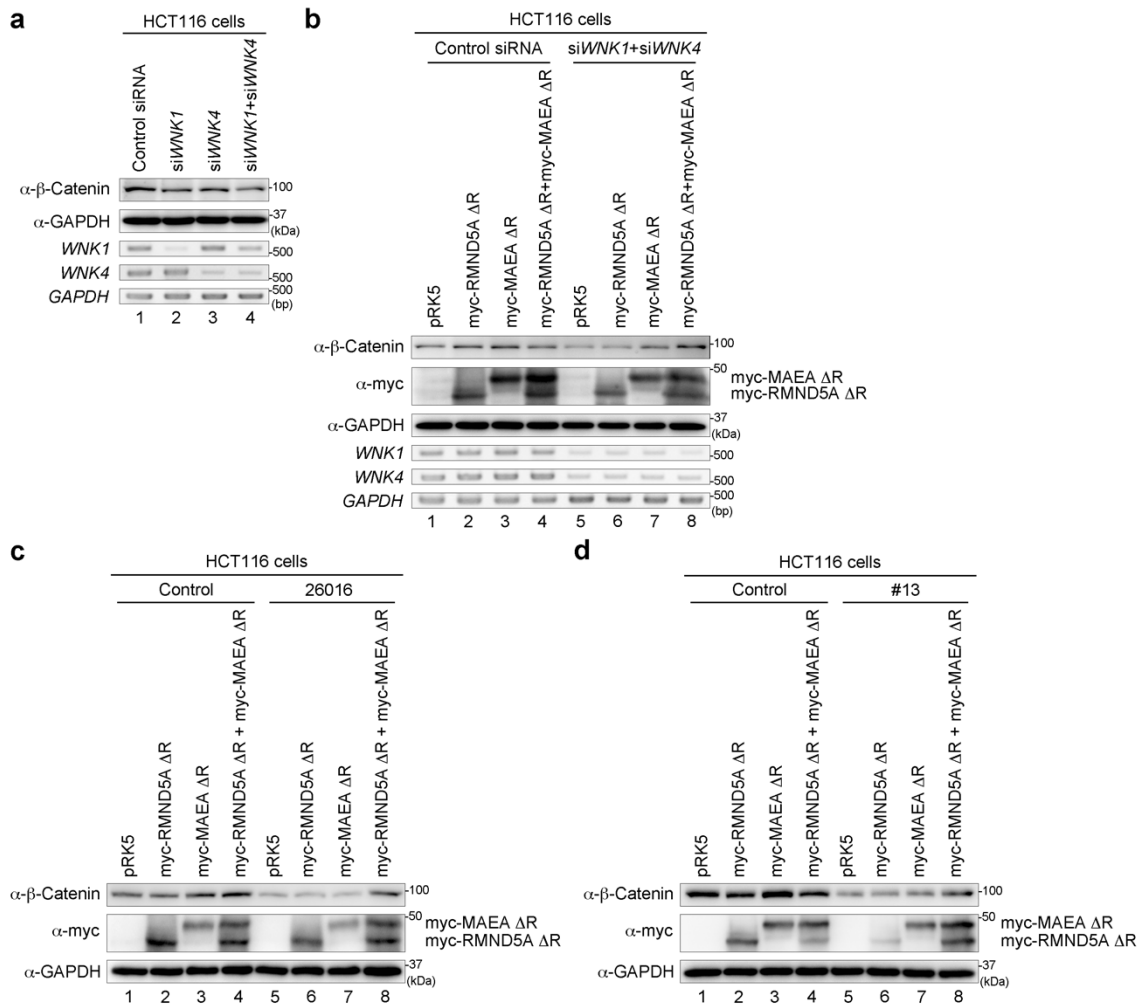

**Supplementary Figure 3. WNK regulates the protein level of β-Catenin in HCT116 colorectal cancer cells.** (a) Western blot analysis of endogenous β-Catenin following the knockdown of *WNK1* and/or *WNK4* in HCT116 colorectal cancer cells. (b-d) Western blot analysis of endogenous β-Catenin following the knockdown of both *WNK1* and *WNK4* (b), treatment with the WNK inhibitor 26016 (c) or #13 (d), or the expression of RMND5A ΔR and/or MAEA ΔR in HCT116 colorectal cancer cells.

### Supplementary Figure 4

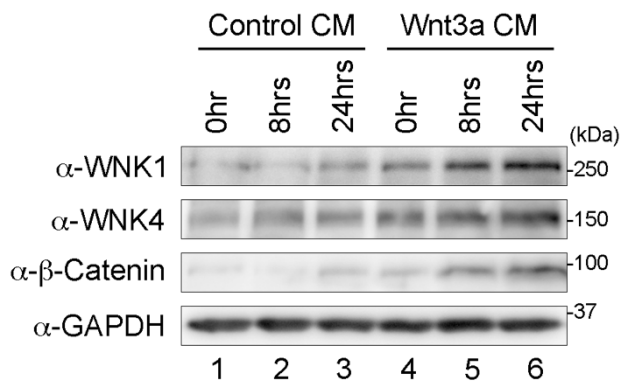

**Supplementary Figure 4. Wnt regulates the protein level of both WNK1 and WNK4.** Western blot analysis of endogenous protein expression with or without Wnt stimulation in HEK293T cells.

**Supplementary Figure 5**

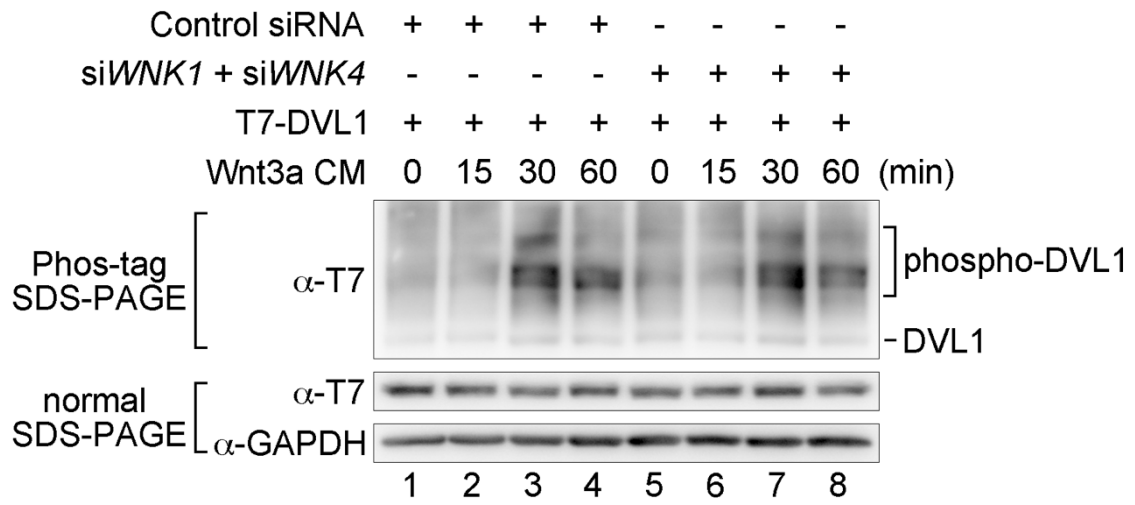

**Supplementary Figure 5. WNK did not affect Dvl1 phosphorylation by Wnt stimulation.** Western blot analysis of T7-DVL1 phosphorylation using Phos-tag SDS-PAGE following treatments of Wnt stimulation or the knockdown of both *WNK1* and *WNK4* in HEK293T cells.

## Supplementary Figure 6

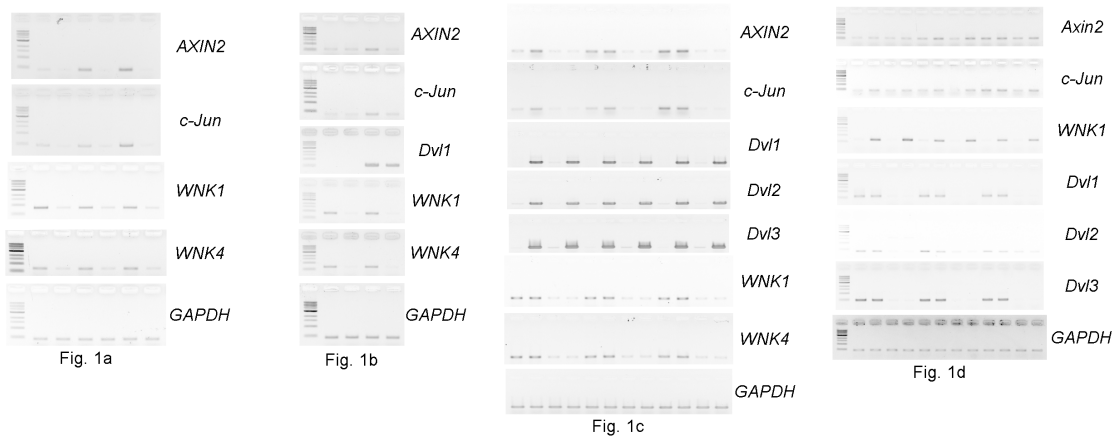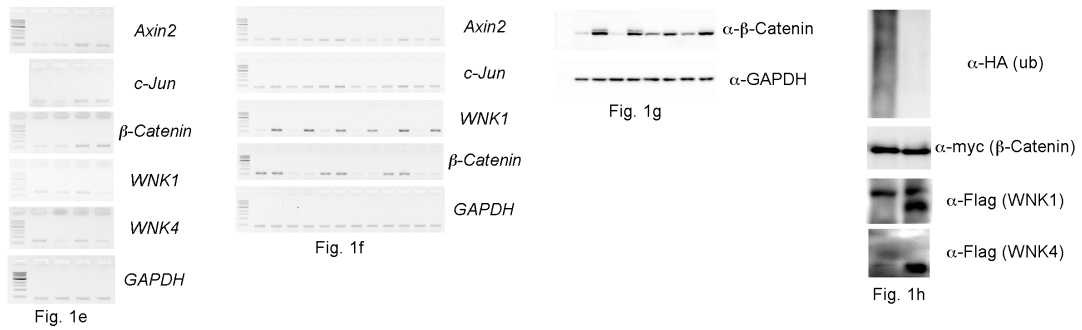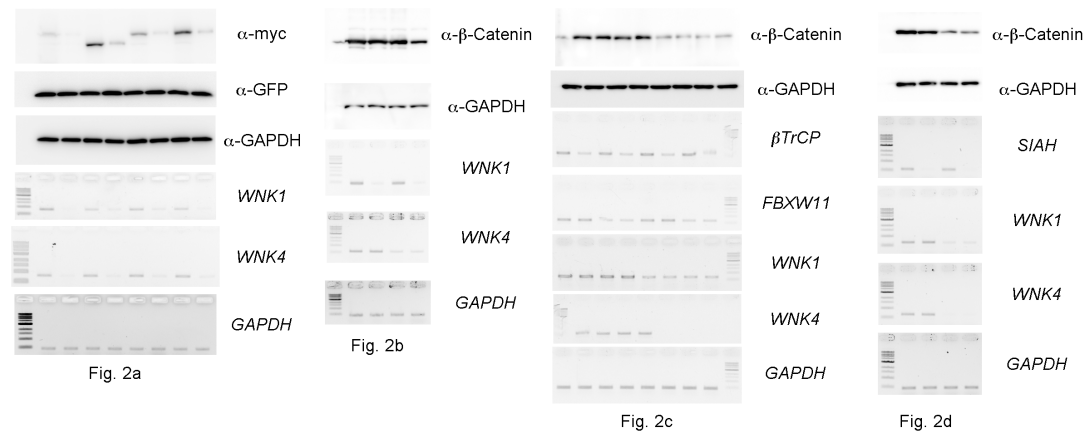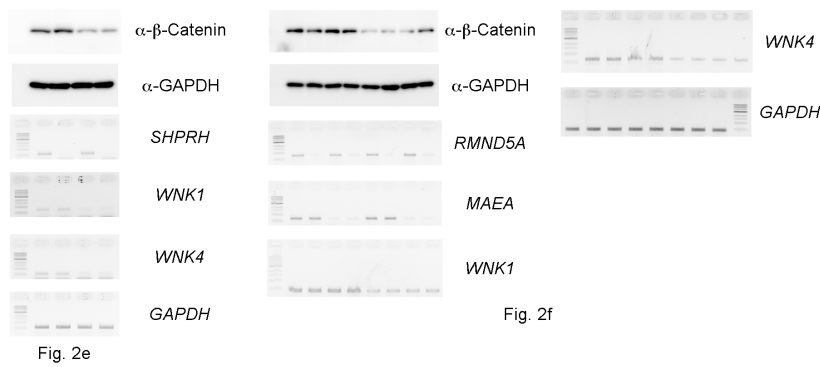

## Supplementary Figure 6 continued

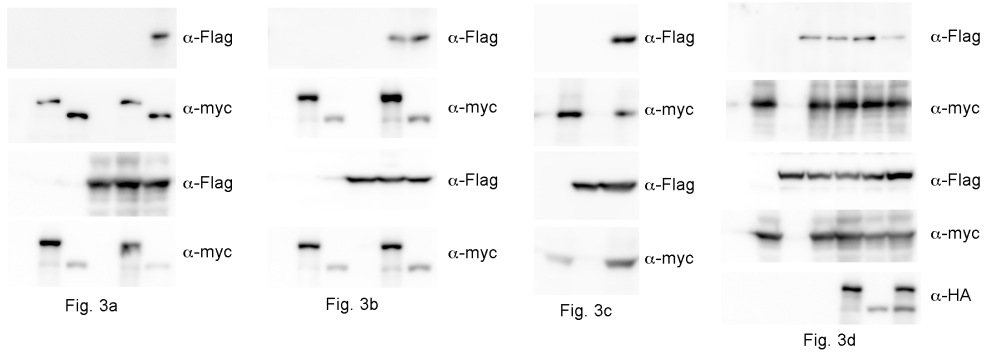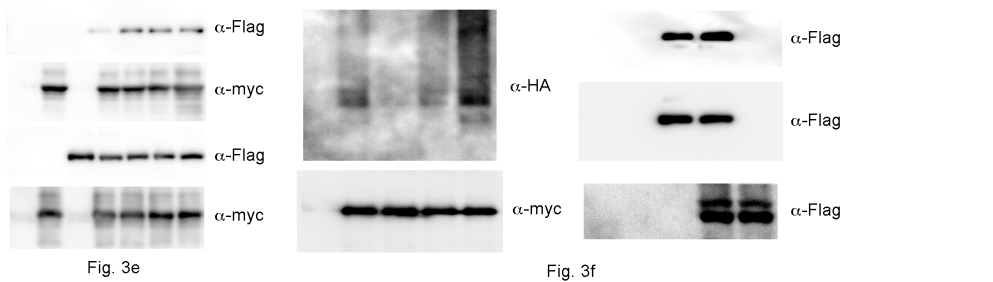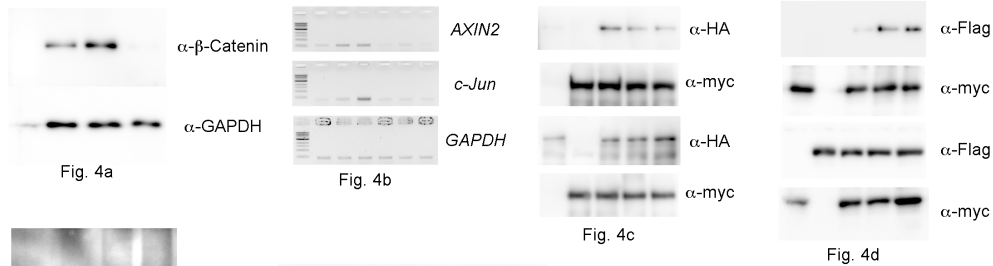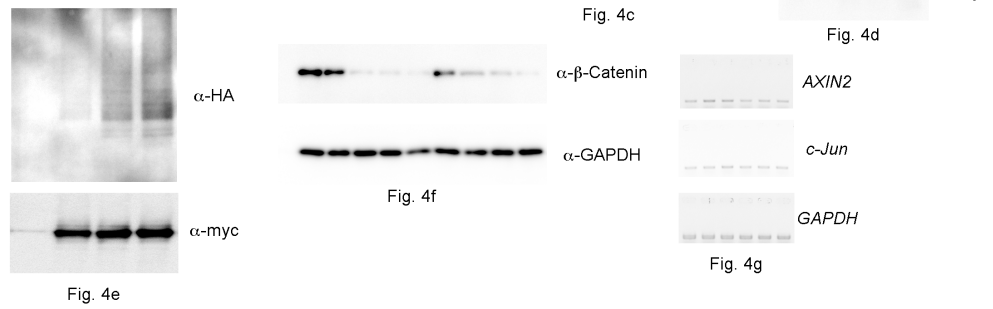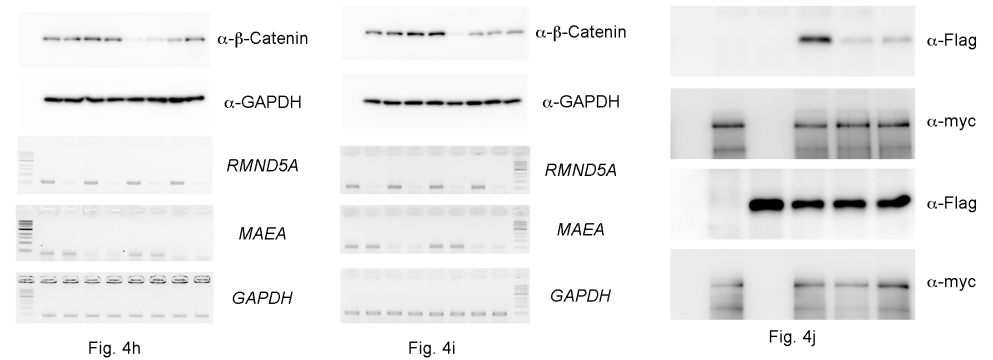

**Supplementary Figure 6 continued**

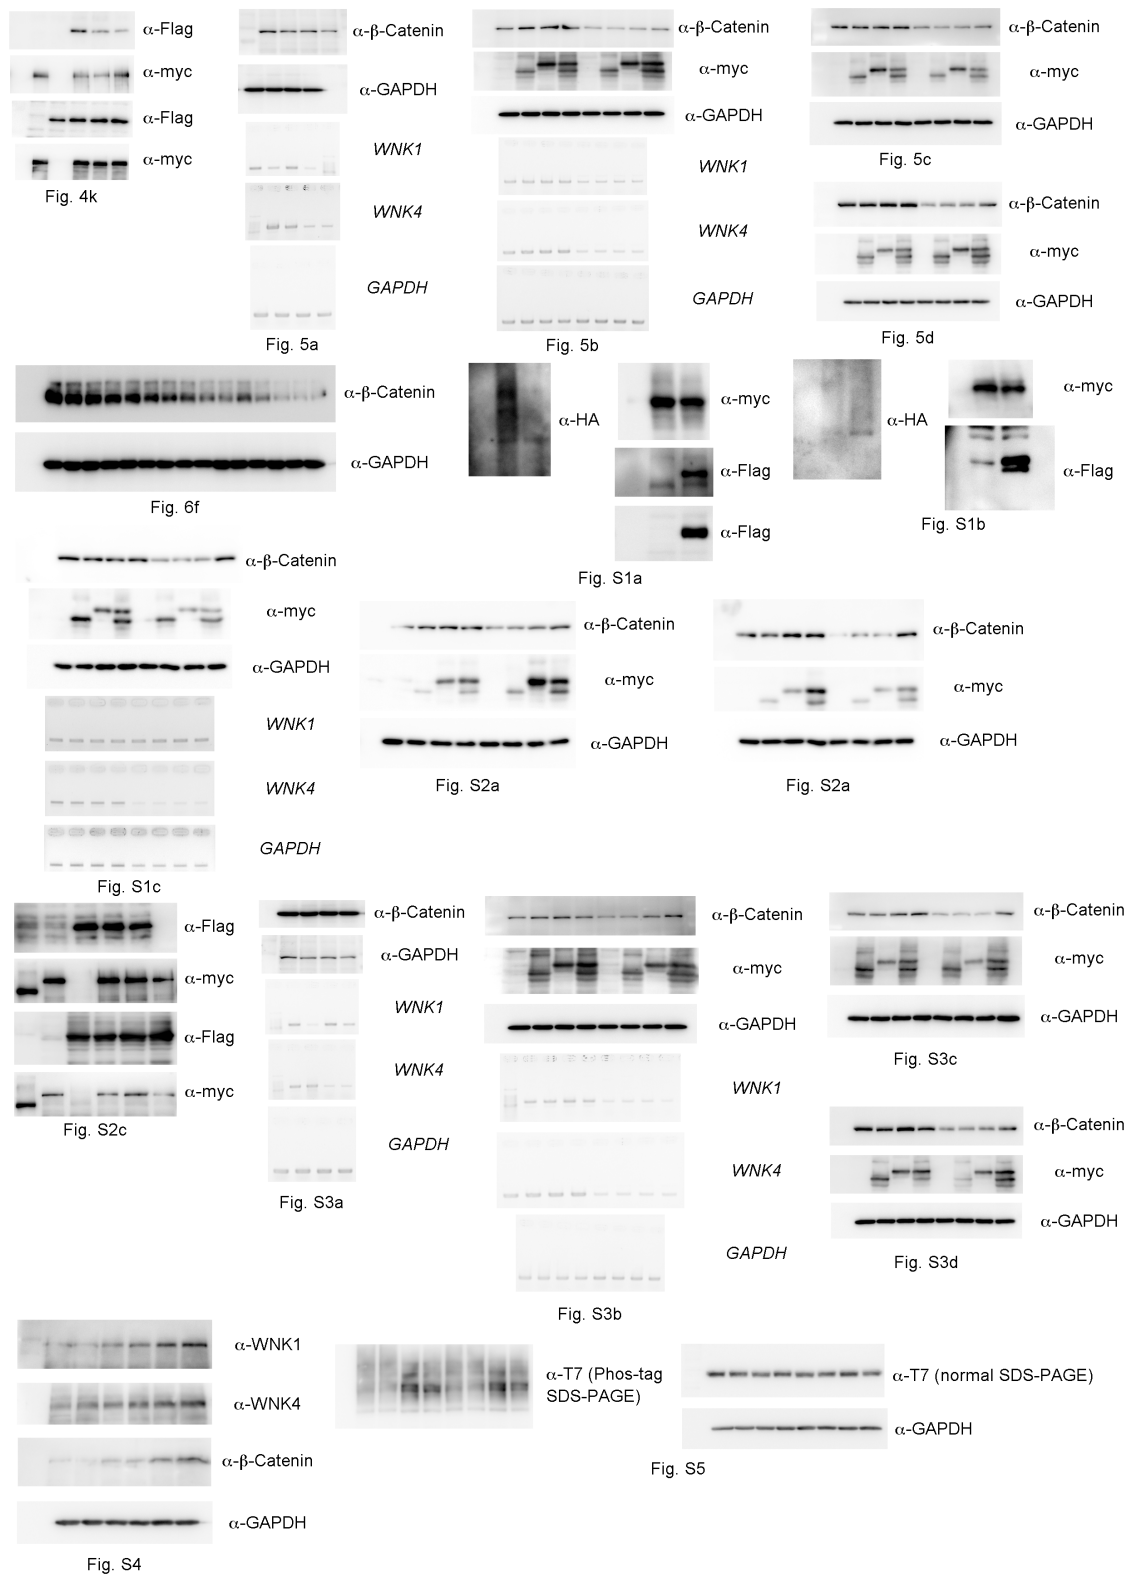

**Supplementary Figure 6. Uncropped immunoblot and gel images. Uncropped**

original images in all Figures and Supplementary Figures

**Supplementary Table 1**

| Gene name              | Target sequence     |
|------------------------|---------------------|
| Human WNK1             | GCAGGAGTGTCTAGTTATA |
| Human WNK4             | GAAATTGAAGATTTGTACA |
| Human Dvl1             | CCTACAAATTCTTCTTTAA |
| Human Dvl2             | CCACTTTCTCCTACCAATA |
| Human Dvl3             | GCTATAAGTTCTTCTTCAA |
| Human $\beta$ -Catenin | GTTATCAGAGGACTAAATA |
| Human $\beta$ TrCP     | GTATTTATTCAAAAACAAA |
| Human FBXW11           | TGATAATGACACATTCGTG |
| Human SIAH1            | GTACTTTTCCCCTGTAAAT |
| Human SHPRH            | TATATGGATTATAGTAGAG |
| Human RMND5A           | CCATTTGTGGAGTTAAATA |
| Human MAEA             | ACGACTTTATCATCTTGAC |

**Supplementary Table 1. Target sequence of siRNA.** 19bp target sequence of siRNA we used. We ordered 21 base RNA with 2 nucleotides 3' overhang sequence for both guide and passenger strands.



**Supplementary Table 2**

| Gene name              | Sequences                 |                            |
|------------------------|---------------------------|----------------------------|
| GAPDH                  | GCCATCACTGCCACCCAGAAGACTG | CATGAGGTCCACCACCCTGTTGCTG  |
| Human WNK1             | AAGTTAGAGCTGCGACGACTACGAG | GGTGCAGAGAACTTCCTTGCCATTC  |
| Human WNK4             | CCAAGTGACTTCATCCAAGGAACCG | TCAGAGAGTTCCTTCGCATGATGCC  |
| Human Axin2            | ACAACAGCATTGTCTCCAAGCAGC  | GTCATGGACATGGAATCATCCGTC   |
| Human c-Jun            | AACCTCAGCAACTTCAACCC      | ACCTGTTCCCTGAGCATGTT       |
| Human DVL1             | CAGAGCACCTCATCCAGACTCATCC | GCTCATGTCACTCTTCACCGTCAGC  |
| Human DVL2             | AACCGAGTCAGTAGTGTCACTGAGG | CAGCGTCATCGTTGCTCATGTTCTC  |
| Human DVL3             | GGACTCCACCATGTCACTCAACATC | ATGGACAAGTGGAAGTCGTCTAGGC  |
| Human $\beta$ -Catenin | AAGACATCACTGAGCCTGCCATCTG | TGGCTCCCTCAGCTTCAATAGCTTC  |
| Human $\beta$ TrCP     | AGCGAATTCTCACAGGCCATACAGG | GTCCCTGTACTGCAAACAGGCAATG  |
| Human FBXW11           | GCAGCGAGTGATCTCAGAAGGAATG | GAACAGGTCACCATCAGTCCATTGC  |
| Human SIAH1            | CGCAACTTGGCTATGGAGAAAGTGG | CAGCTTGCTTGCGTGTTCCCTATCAG |
| Human SHPRH            | ATGGCTCTGAGGAATCGTGTGTCTG | TCCTCCTCCTGGTTTGCTTTCTCTG  |
| Human RMND5A           | AGACATCCACAGCAGTGTTTCTCGG | CACAGATATCAGCCCCTGGTTTGC   |
| Human MAEA             | TCGAGCACCTCAAAGAGCATAGCAG | GTTGTCGTACCGGAACTGCTGGATC  |

**Supplementary Table 2. Sequences of primers.** All primers are located in coding sequence.
